# Supplementary material for: Selective capture of CO2 by poly(amido amine) dendrimer-loaded organoclays
Source: Royal Society of Chemistry journal article supplement (doi:10.1039/c5ra04904k), 2015-01-01
Supplement: c5ra04904k1.pdf [file c5ra04904k1.pdf]

## Supporting Information

# Selective capture of CO<sub>2</sub> by poly(amido amine) dendrimer-loaded organoclays

Kinjal J. Shah,<sup>a</sup> Toyoko Imae<sup>a,b\*</sup> and Atindra Shukla<sup>c</sup>,

<sup>a</sup> Graduate Institute of Applied Science and Technology, National Taiwan University of Science and Technology, Taipei 10607, Taiwan,

<sup>b</sup> Department of Chemical Engineering, National Taiwan University of Science and Technology, Taipei 10607, Taiwan,

<sup>c</sup> Shah-Schulman Center for Surface Science and Nanotechnology, Dharmsinh Desai University, Nadiad 387001, India.

**Table S1** Particle size of clays and organoclays.

| Dendrimer/clay proportion | Laponite clay (nm) | Hydrotalcite clay (nm) | Sericite clay (nm) |
|---------------------------|--------------------|------------------------|--------------------|
| 0.0                       | 42                 | 130                    | 631                |
| 0.1                       | 60                 | 165                    | 693                |
| 0.2                       | 87                 | 190                    | 738                |
| 0.3                       | 101                | 224                    | 768                |
| 0.4                       | 124                | 240                    | 776                |
| 0.5                       | 129                | 246                    | 781                |
| 0.6                       | 131                | 248                    |                    |
| 0.7                       | 133                |                        |                    |

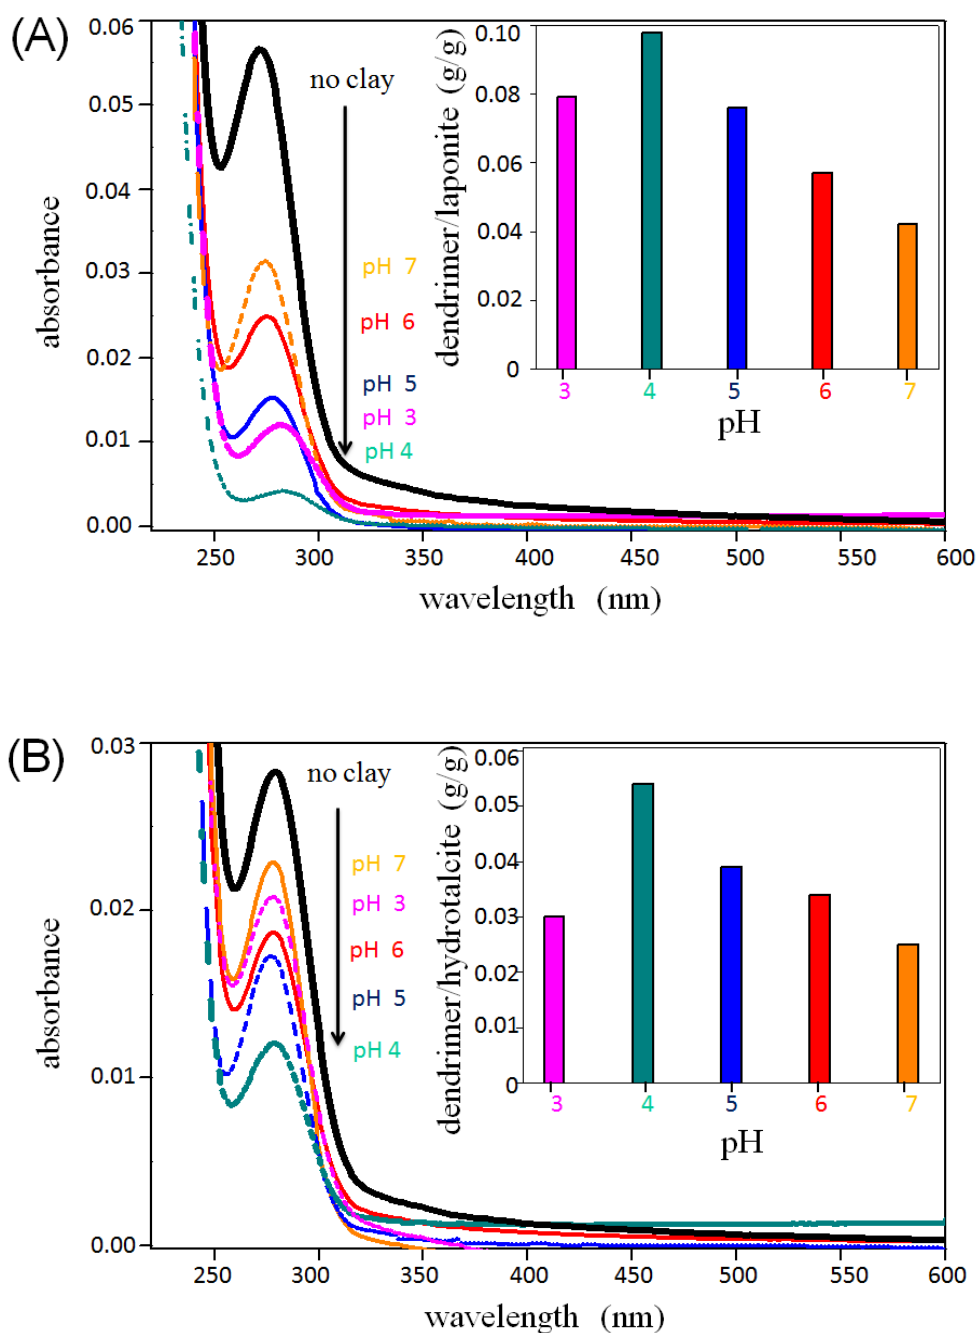

**Figure S1.** UV-visible absorption spectra of supernatants after the loading procedure of PAMAM dendrimer (10 mg) on clays (100 mg) at different pHs. Solid line with highest absorbance indicates an absorption spectrum of an aqueous dendrimer solution without treatment with clay. Inset is the comparison of dendrimer loading against clay at different pH. (A) laponite; (B) hydrotalcite.

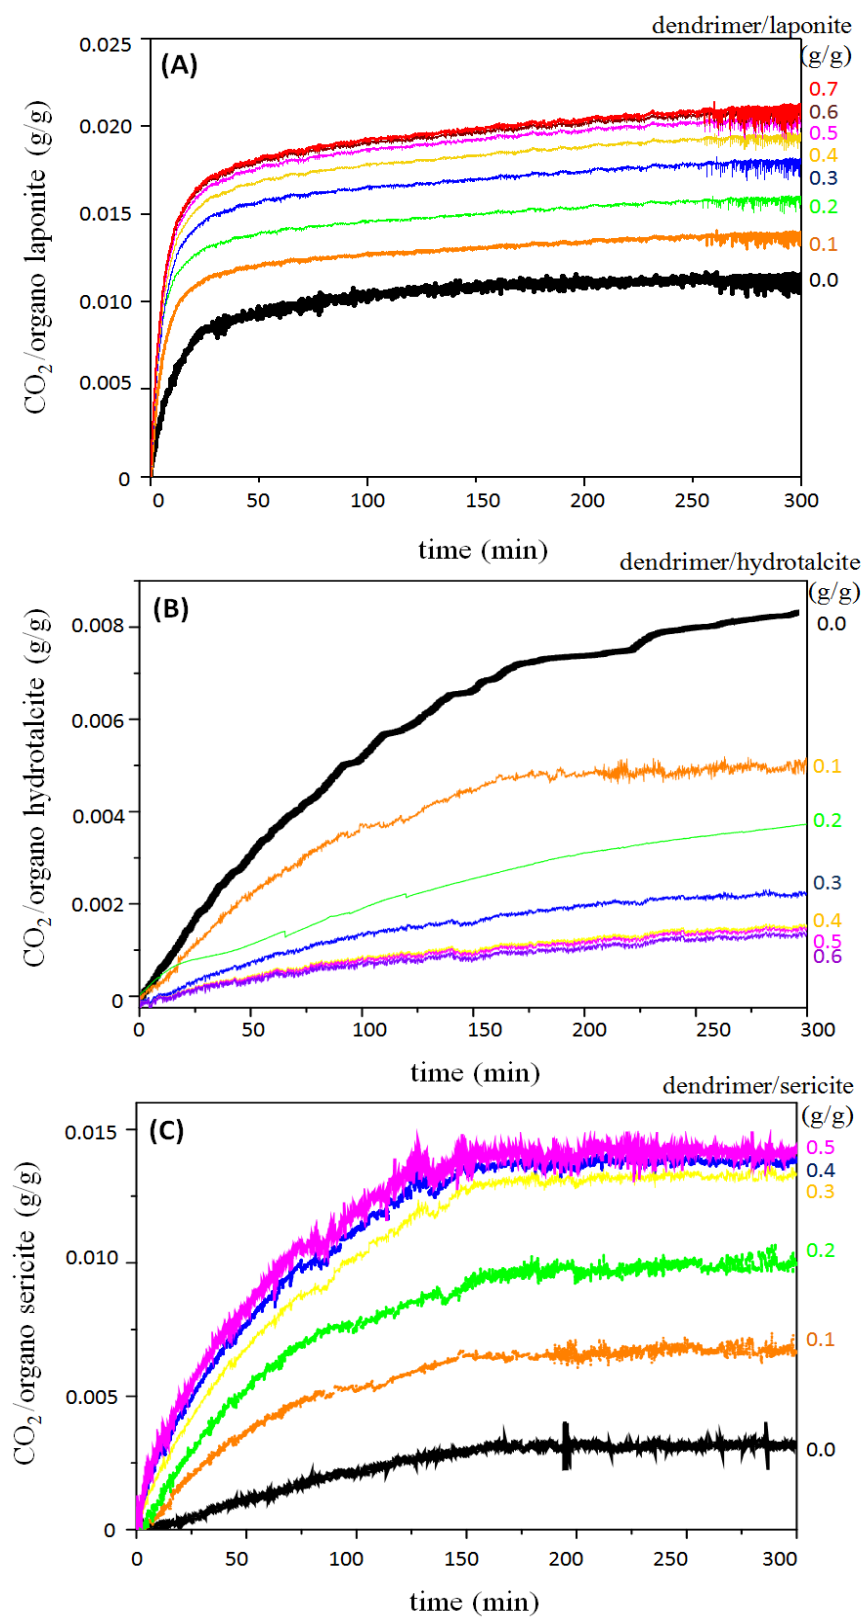

**Figure S2.** Time-course CO<sub>2</sub> adsorption on pristine and organo clays at different dendrimer/clay weight mixing ratios. (A) Laponite, (B) hydrotalcite, and (C) sericite.

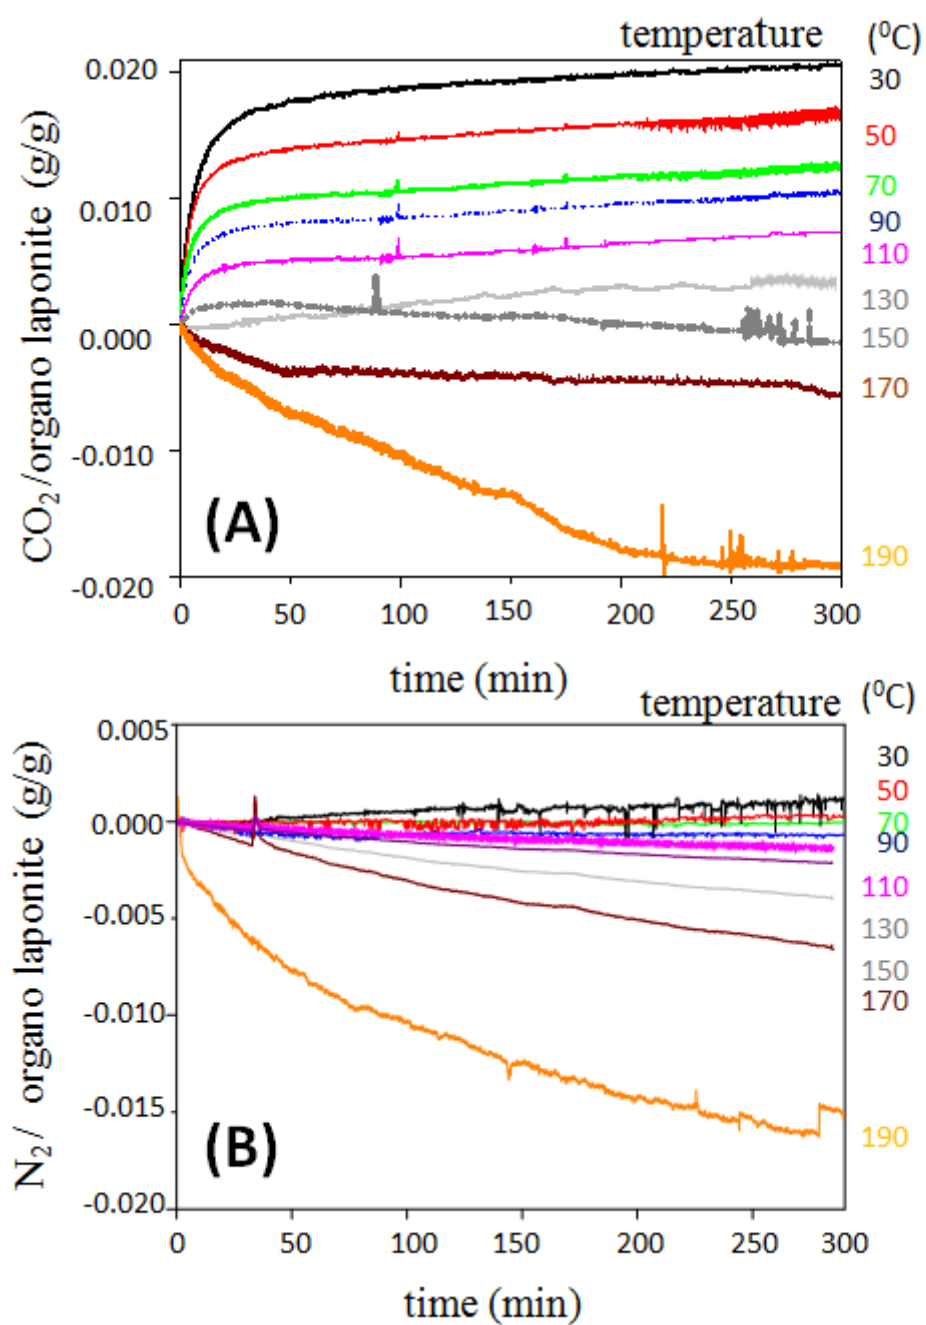

**Figure S3.** Time-course (A) CO<sub>2</sub> and (B) N<sub>2</sub> adsorption on organo laponite (Lap0.7) at different temperatures.
